# Supplementary material
Source: PubMed Central journal article supplement (PMC2781592)

## Supplemental Figure Legends

*Supplemental Figure 1.* Knockdown of Akt 1 and 2 but not 3 in INS-1  $\beta$ -cells. INS-1 cells were transfected with scramble (200 nM) or Akt 1&2 (100 nM each) siRNA as described in the methods and experiments performed 72 h later. Western analysis was performed on total cell lysates with indicated antibodies. Shown are representative blots of 3 independent experiments. Anti- $\beta$ -actin blot was an internal control.

*Supplemental Figure 2.* Inhibitors of p38 MAPK and JNK suppress STS-induced INS-1 cell death in a concentration dependent manner. INS-1 cells were treated without or with STS (100 nM)  $\pm$  increasing concentrations (0.5  $\mu$ M – 10  $\mu$ M) of p38 MAPK inhibitors (SB 203580 or SB 202190) or JNK inhibitors (SP600125 or JNK Inhibitor VIII) for 6 h and cell death determined. Mean  $\pm$  SEM of cell death (n=4); #,  $p < 0.05$  vs STS only.

*Supplemental Figure 3.* GIP promotes survival of STS treated MIN6 cells via suppression of p38 MAPK and JNK. *A*, MIN6 cells were treated without or with STS (500 nM)  $\pm$  10 nM GIP for 6 h and cell death determined. Mean  $\pm$  SEM (n=4); #,  $p < 0.05$  as indicated. *B*, MIN6 cells were treated without or with STS (500 nM)  $\pm$  10 nM GIP for 4 h and Western analysis performed on total cell lysates with indicated antibodies. *C*, MIN6 cells were treated without or with STS  $\pm$  p38 MAPK inhibitor (p38i; 5 $\mu$ M SB 203580) and JNK inhibitor (JNKi; 5 $\mu$ M SP600125) for 6 h and cell death determined. Mean  $\pm$  SEM of cell death (n=4); #,  $p < 0.05$  as indicated. *D*, MIN6 cells were treated without or with STS (500 nM)  $\pm$  p38 MAPK inhibitor (p38i; 5 $\mu$ M SB 203580) and JNK inhibitor (JNKi; 5 $\mu$ M SP600125) for 4 h and Western analysis performed on total cell lysates with indicated antibodies. Shown in *B* and *D* are representative blots of 4 independent experiments. Anti- $\beta$ -actin blot was an internal control.

Figure S1.

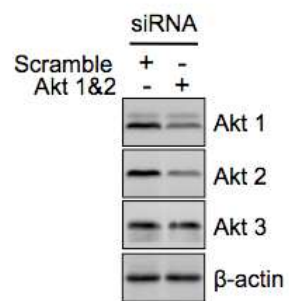

Figure S2.

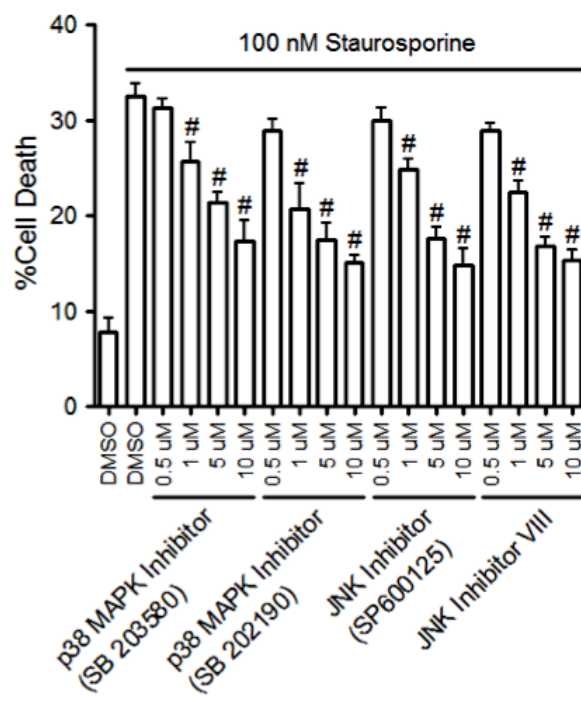

Figure S3.

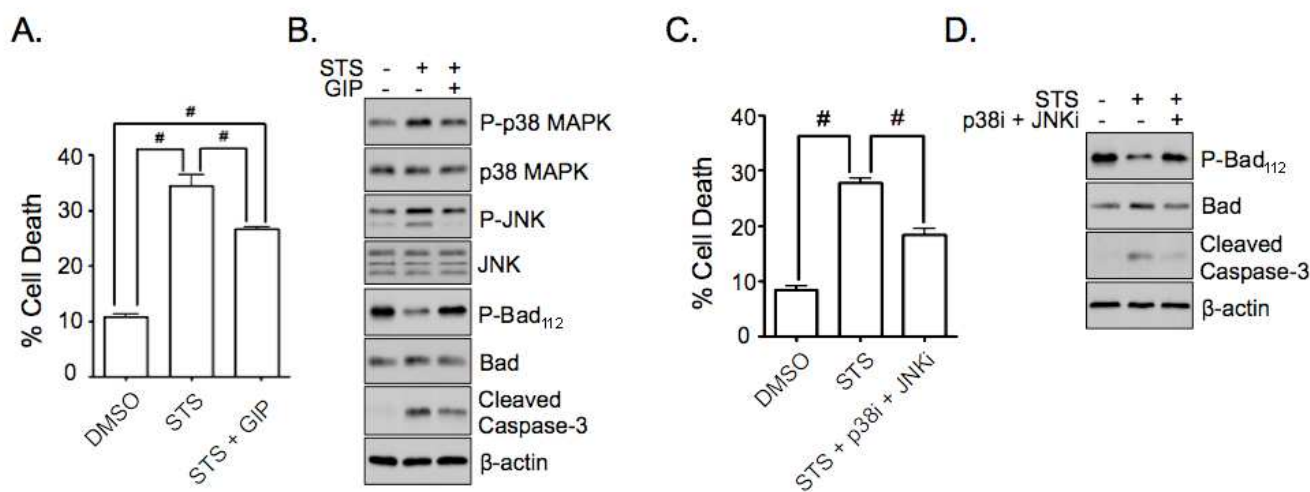

Supplement: supp_M109.060178_jbc.M109.060178-1.pdf [file supp_M109.060178_jbc.M109.060178-1.pdf]
